# Supplementary material
Source: PubMed Central journal article supplement (PMC4521215)
Supplement: NIHMS574725-supplement-Supplemental.pdf [file NIHMS574725-supplement-Supplemental.pdf]

Supplemental Table 1.

| Strains and plasmids used in this study.            |                                                                                                     |                                            |
|-----------------------------------------------------|-----------------------------------------------------------------------------------------------------|--------------------------------------------|
| Strain name                                         | Relevant Genotype / Notes                                                                           | Source                                     |
| <u><i>Staphylococcus aureus</i> strains</u>         |                                                                                                     |                                            |
| RN4220                                              | Restriction-minus derivative of NCTC8325                                                            | [1]                                        |
| JMB1100                                             | USA300_LAC                                                                                          | Submitted                                  |
| JMB1293                                             | USA300_LAC <i>srrAB</i> Δ                                                                           | This study                                 |
| JMB2579                                             | USA300_LAC <i>srrAB</i> Δ,<br>Φ11 <i>attB</i> ::pLL39                                               |                                            |
| JMB2592                                             | USA300_LAC <i>srrAB</i> Δ,<br>Φ11 <i>attB</i> ::pLL39_ <i>srrA</i> <sup>FLAG</sup> <i>srrB</i>      | This study                                 |
| JMB3946                                             | USA300_LAC <i>srrAB</i> Δ,<br>Φ11 <i>attB</i> ::pLL39_ <i>srrA</i> <sup>FLAG-D53A</sup> <i>srrB</i> | This study                                 |
| <u><i>Escherichia coli</i> strains</u>              |                                                                                                     |                                            |
| PX5                                                 | Restriction-minus cloning.<br>Protein production.                                                   | Protein Express<br>Agilent<br>Technologies |
| BL21 (DE3) CodonPlus-RIL                            |                                                                                                     |                                            |
| <u><i>Saccharomyces cerevisiae</i> strains</u>      |                                                                                                     |                                            |
| FY2                                                 | <i>MAT</i> α, <i>ura3-52</i>                                                                        | [2]                                        |
| Plasmids                                            |                                                                                                     | Source                                     |
| pET24a                                              |                                                                                                     | Novagen                                    |
| pET24a_ <i>nono</i>                                 |                                                                                                     | This study                                 |
| pCMVeGFP-C1                                         |                                                                                                     | Clontech                                   |
| pCMVeGFP-C1_ <i>nono</i>                            |                                                                                                     | This study                                 |
| pLL39                                               |                                                                                                     | [3]                                        |
| pLL2787                                             |                                                                                                     | [3]                                        |
| pLL39_FLAG_ <i>srrAB</i>                            |                                                                                                     | This study                                 |
| pLL39_FLAG_ <i>srrA</i> <sub>D53E</sub> <i>srrB</i> |                                                                                                     | This study                                 |



**Supplemental Material.** A Universal Cloning Method that is simple, efficient, and versatile.

Tammy M. Joska, Ameya Mashruwala, Jeff M. Boyd and William J. Belden

**Yeast transformation (approximately 2 hrs of bench time).** The Yeast transformation listed below is the protocol we used throughout but any high-efficiency yeast transformation should be suitable.

### **Prepare Cells**

1| Back dilute a 50mL culture of YPD with 1 mL of overnight stationary phase yeast culture. Incubate at 30°C with shaking (150-250 rpm) for approximately 4-5 hours or until mid log phase of growth is achieved (O.D.<sub>600</sub> = 1.0).

3| Transfer yeast to a sterile 50mL conical tube and pellet cells by centrifugation at 2,500 x g for 5 minutes. Wash cells with 25mL of sterile water and pellet again.

5| Decant supernatant and suspend cell pellet in 1mL of 0.1 M LiOAc and transfer to sterile 1.5mL microfuge tube.

6| Spin at 10,000 x g at room temperature for 15 seconds to pellet cells. Decant LiOAc supernatant and suspend cells in 400 µL of 0.1 M LiOAc.

8| Aliquot 50uL cells per transformation in a 1.5 mL microfuge tube. Keep cells on the benchtop at room temperature until use.

**NOTE:** cells can be refrigerated for up to a week with negligible effects on overall efficiency.

### **Prepare DNA**

9| Combine ~0.5 -1.0 µg of each of the overlapping fragment into a sterile microcentrifuge tube. Bring to a total volume of 34 µl in water.

### **Prepare transformation mix**

10| Prepare a master mix depending on the number of samples that will be transformed using the recipe shown below. 325 µL is used per transformation.

11| Dilute salmon sperm DNA to 2.0 mg/mL and denature by boiling for 5 minutes, then place on ice for an additional 5 minutes.

### **Transformation Mix**

- 240  $\mu$ L 50% PEG 3350
- 36  $\mu$ L 1M LiOAc
- 50  $\mu$ L 2mg/mL carrier DNA
- 34- x  $\mu$ L sterile H<sub>2</sub>O (x is the total volume of DNA fragments)

### **Perform Transformation**

- 12| Pellet cells from step 8 by centrifugation at 16,000 x g for 15 sec. Decant the LiOAc.
- 13| Suspend cell pellet with the 34 ml of DNA mixture from Step 9.
- 14| Add 325  $\mu$ l of transformation mix to each tube and vortex gently.
- 15| Incubate at 30°C for 30 minutes.
- 16| Mix by inverting, then heat shock at in a 42°C for precisely 30 minutes.
- 17| Spin cells for 15 sec as above and decant the supernatant.
- 19| Suspend the cell pellet in 100  $\mu$ l sterile H<sub>2</sub>O and spread on YMD agar plates Grow for 2-3 days at 30°C.

### **Plasmid Recovery.**

Once yeast colonies have appeared on the plate, these can either be pooled by scraping cells off the plates in the presence of 1 ml H<sub>2</sub>O and then isolate DNA directly from the pooled cells. Alternatively, individually colonies can be grown up overnight in liquid culture. There are numerous high-quality protocols to extract DNA from *S. cerevisiae* and any can be followed. In general, the quality of DNA will greatly affect the efficiency of the bacterial transformation. The “quick and dirty” yeast smash and grab protocol is sufficient after scraping and pooling all the yeast colonies off the plate, but this requires using high-efficiency electrocompetent cells for the bacterial transformation. This typically results in ~200 colonies per plate. If using less efficient competent cells, we recommend using a more elaborate DNA isolation method.

### **REAGENTS**

- FY2 strain of *Saccharomyces cerevisiae*

-YPD / YPD Agar Plates

- Yeast Extract(Fisher Sci –BP1422)
- Peptone (Fisher Sci – BP1420)
- Dextrose (Fisher Sci – D16)
- Agar (US Biological – A0930)

- YMD Plates
  - Yeast Nitrogen Base (Becton & Dickinson – 291940)
  - Dextrose (see above)
  - Agar (see above)
- Sterile H<sub>2</sub>O
- 1M LiOAc (Sigma – L6883)
- 50% PEG 3350 (Sigma – P3640)
- 2 mg/mL salmon sperm (carrier DNA)
